# Supplementary material
Source: publisher figshare collection journal article supplement (https://karger.figshare.com/ndownloader/files/18714569)
Supplement: Supplementary file 1 [file 18714569]

Supplementary Figure 1

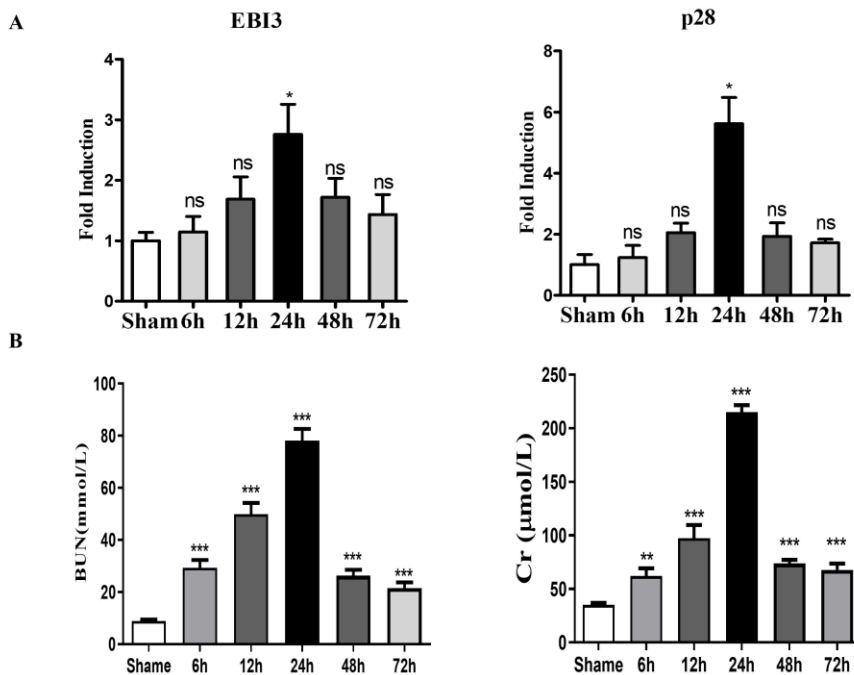

**Figure S1 | IL-27 is upregulated in post-ischemic kidney.** (A) Real-time polymerase chain reaction (RT-PCR) was used to examine fold changes of EB13 and p28 mRNA expression in sham operated and IR kidney at 6 h, 12 h, 24 h 48 h and 72 h post-IR induction. (B) Blood urea nitrogen (BUN) and serum creatinine (SCr) levels were assessed at 6 h, 12 h, 24 h, 48 h and 72 h post-IR induction. \* $P < 0.05$ , \*\* $P < 0.01$ , \*\*\* $P < 0.001$ , ns, not significant, compared with sham-operated. Similar results were obtained in 3 independent experiments with 6 to 7 mice per group

Supplementary Figure 2

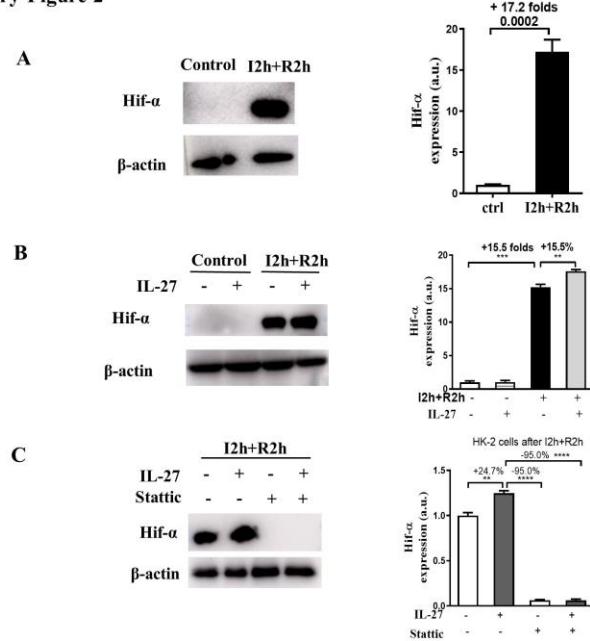

**Figure S2 | Hif-α increased after I2h+R2h treatment and IL-27 treatment through STAT3 signaling.** (A) Representative Western blot images of Hif-α and β-actin in HK-2 cells after I2h+R2h treatment and densitometric analysis of Hif-α were shown. (B) Representative Western blot images of Hif-α and β-actin in HK-2 cells after I2h+R2h treatment and IL-27 treatment. And the densitometric analysis was shown on the right. (C) The expression of Hif-α in I2h+R2h treated HK-2 cells were assessed after IL-27 and STAT3 inhibitor Stattic treatment. Densitometric analysis of Hif-α was shown on the right. Values were expressed as relative expression. Data are expressed as means ± SEM of more than three independent experiments in triplicate culture. \* $P < 0.05$ , \*\* $P < 0.001$ , \*\*\* $P < 0.0001$ .

Supplementary Figure 3

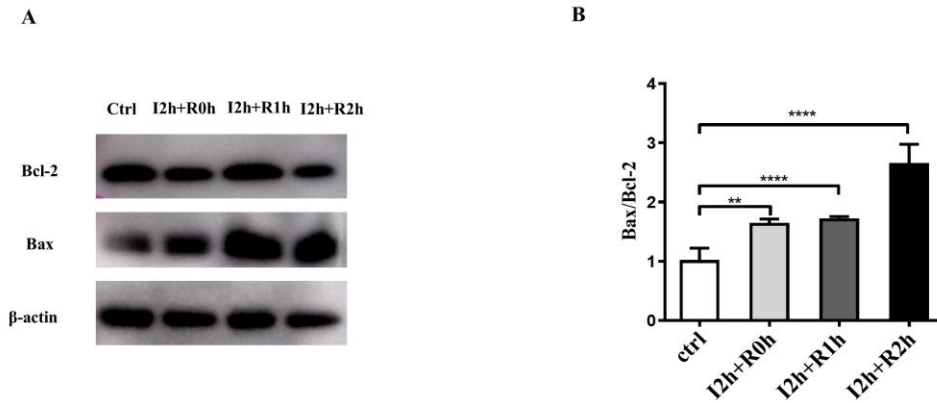

**Figure S3 | The ratio of Bax/Bcl-2 increased in a reperfusion time depend manner.** HK-2 cells were exposed to ischemia for 2 h following reperfusion for 0 to 2 h to collect whole cell lysates for western blot analysis of Bax, Bcl-2 and  $\beta$ -actin. (A) Representative blots. (B) Assessment of Bax/Bcl-2. Data are expressed as means  $\pm$  SEM of more than three independent experiments in triplicate culture. \*\* $P$ <0.01, \*\*\*\* $P$ <0.0001.
